# Supplementary material for: Passive Acoustic Monitoring and Automatic Detection of Diel Patterns and Acoustic Structure of Howler Monkey Roars
Source: MDPI journal article supplement (doi:10.3390/d13110566), 2021-11-05
Supplement: s1 [file s1]

Archive with 1 entries (1 files):
- Supporting information.pdf
